# Supplementary material for: Measurement Report: Optical properties and sources of water-soluble brown carbon in Tianjin, North China: insights from organic molecular compositions
Source: Copernicus journal article supplement (doi:10.5194/acp-2021-1045), 2022-01-16
Supplement: Supplementary file 1 [file acp-2021-1045-supplement.pdf]

## Supporting Information

# Optical properties and sources of water-soluble brown carbon in Tianjin, North China: insights from organic molecular compositions

5 Junjun Deng<sup>1</sup>, Hao Ma<sup>1</sup>, Xinfeng Wang<sup>2</sup>, Shujun Zhong<sup>1</sup>, Zhimin Zhang<sup>1</sup>, Jialei Zhu<sup>1</sup>, Yanbing Fan<sup>1</sup>,  
Wei Hu<sup>1</sup>, Libin Wu<sup>1</sup>, Xiaodong Li<sup>1</sup>, Lujie Ren<sup>1</sup>, Chandra Mouli Pavuluri<sup>1</sup>, Xiaole Pan<sup>3</sup>, Yele Sun<sup>3</sup>, Zifa  
Wang<sup>3</sup>, Kimitaka Kawamura<sup>4</sup>, and Pingqing Fu<sup>1</sup>

<sup>1</sup>Institute of Surface-Earth System Science, School of Earth System Science, Tianjin University, Tianjin 300072, China

<sup>2</sup>Environment Research Institute, Shandong University, Jinan 250100, China

10 <sup>3</sup>State Key Laboratory of Atmospheric Boundary Layer Physics and Atmospheric Chemistry, Institute of Atmospheric  
Physics, Chinese Academy of Sciences, Beijing 100029, China

<sup>4</sup>Chubu Institute for Advanced Studies, Chubu University, Kasugai 487-8501, Japan

*Correspondence to:* Pingqing Fu (fupingqing@tju.edu.cn)

**Table S1. Concentrations of carbonaceous species and molecular markers in PM<sub>2.5</sub> in Tianjin.**

|                                               | Winter     |              |                | Summer     |              |                |
|-----------------------------------------------|------------|--------------|----------------|------------|--------------|----------------|
|                                               | Day (n=41) | Night (n=43) | Average (n=84) | Day (n=30) | Night (n=30) | Average (n=60) |
| Carbonaceous species ( $\mu\text{g m}^{-3}$ ) |            |              |                |            |              |                |
| WSOC                                          | 10.1±7.1   | 9.3±4.5      | 9.7±5.9        | 2.6±1.0    | 2.4±1.1      | 2.5±1.1        |
| OC                                            | 23.7±15.7  | 24.0±11.0    | 23.9±13.4      | 4.0±1.3    | 3.6±1.5      | 3.8±1.4        |
| EC                                            | 2.4±1.6    | 2.7±1.5      | 2.6±1.5        | 0.4±0.1    | 0.5±0.2      | 0.4±0.1        |
| SOC                                           | 14.6±10.7  | 13.5±7.9     | 14.0±9.4       | 2.4±1.1    | 1.7±1.1      | 2.1±1.1        |
| Molecular markers ( $\text{ng m}^{-3}$ )      |            |              |                |            |              |                |
| levoglucosan                                  | 207±122    | 296±153      | 252±145        | 12.8±7.0   | 34.4±46.0    | 23.6±34.4      |
| arabitol                                      | 3.9±3.1    | 4.8±3.2      | 4.4±3.2        | 1.8±1.7    | 1.9±2.0      | 1.9±1.8        |
| glucose                                       | 13.8±5.8   | 13.6±6.5     | 13.7±6.1       | 6.5±2.5    | 7.0±7.5      | 6.8±5.6        |
| trehalose                                     | 4.7±3.6    | 4.1±2.5      | 4.4±3.1        | 1.8±1.6    | 1.9±2.0      | 1.9±1.8        |
| xylose                                        | 12.1±7.7   | 16.3±8.3     | 14.4±8.2       | 2.4±1.0    | 3.2±3.0      | 2.8±2.3        |
| isoprene SOA tracers                          | 5.4±3.4    | 5.4±3.0      | 5.4±3.2        | 29.6±22.3  | 25.3±23.6    | 27.4±22.9      |
| monoterpene SOA tracers                       | 13.2±7.4   | 14.1±6.2     | 13.6±6.8       | 23.4±13.6  | 22.4±23.7    | 22.9±19.2      |
| sesquiterpene SOA tracer                      | 12.2±10.2  | 12.6±9.9     | 12.4±10.0      | 2.0±1.8    | 2.2±4.5      | 2.1±3.4        |
| DHOPA <sup>a</sup>                            | 4.4±2.5    | 4.3±2.2      | 4.4±2.3        | 2.1±1.5    | 1.7±2.7      | 1.9±2.2        |
| phthalic acids                                | 66.6±39.8  | 74.1±35.3    | 70.4±37.5      | 18.5±9.5   | 18.5±21.3    | 18.5±16.4      |

15 <sup>a</sup> DHOPA: 2,3-dihydroxy-4-oxopentanoic acid.

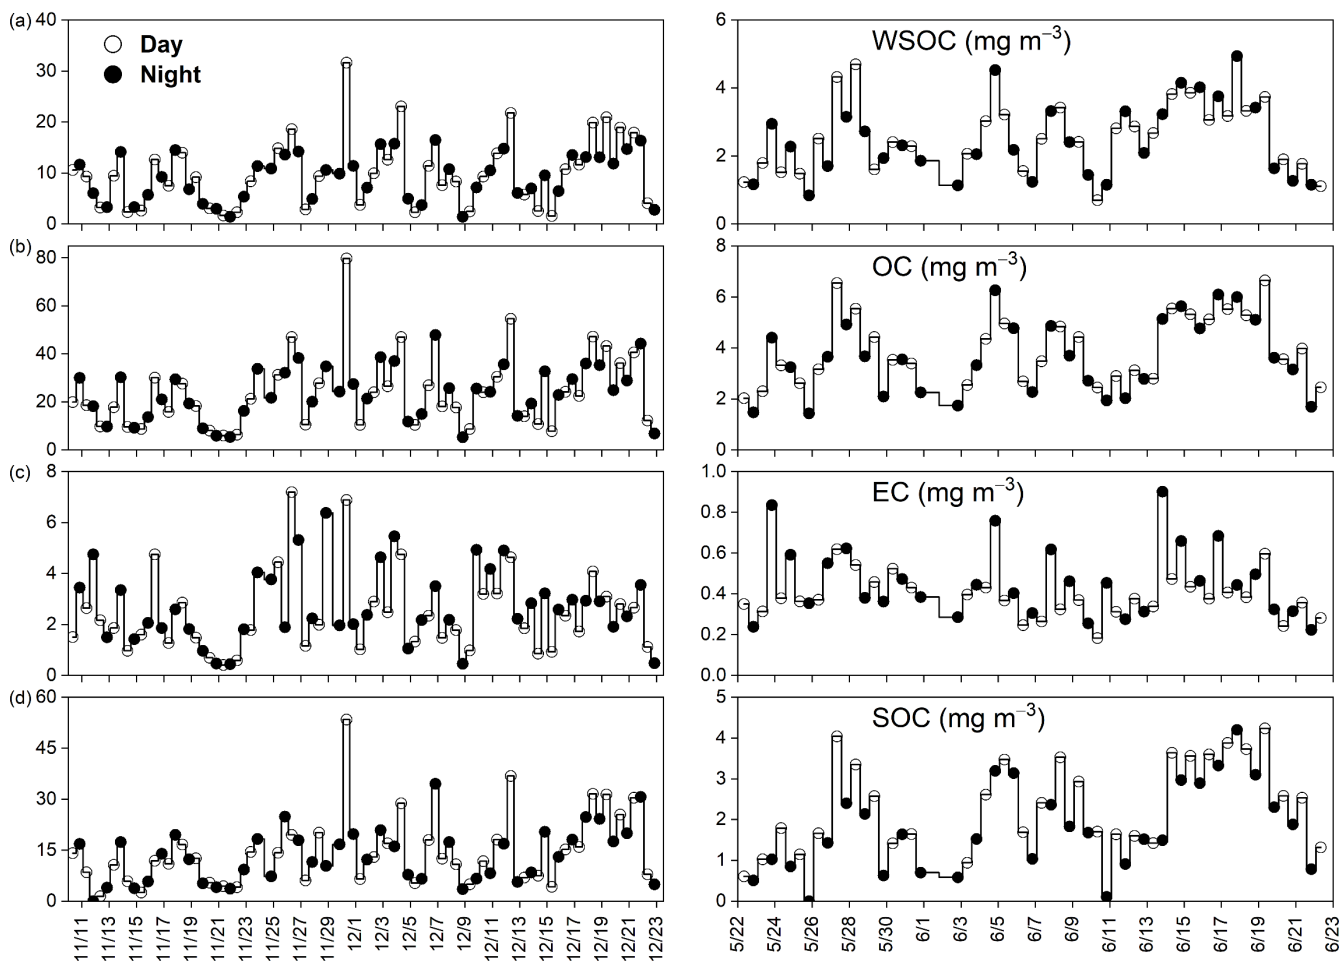

Figure S1. Temporal variations in concentrations of (a) WSOC, (b) OC, (c) EC, and (d) SOC in Tianjin.

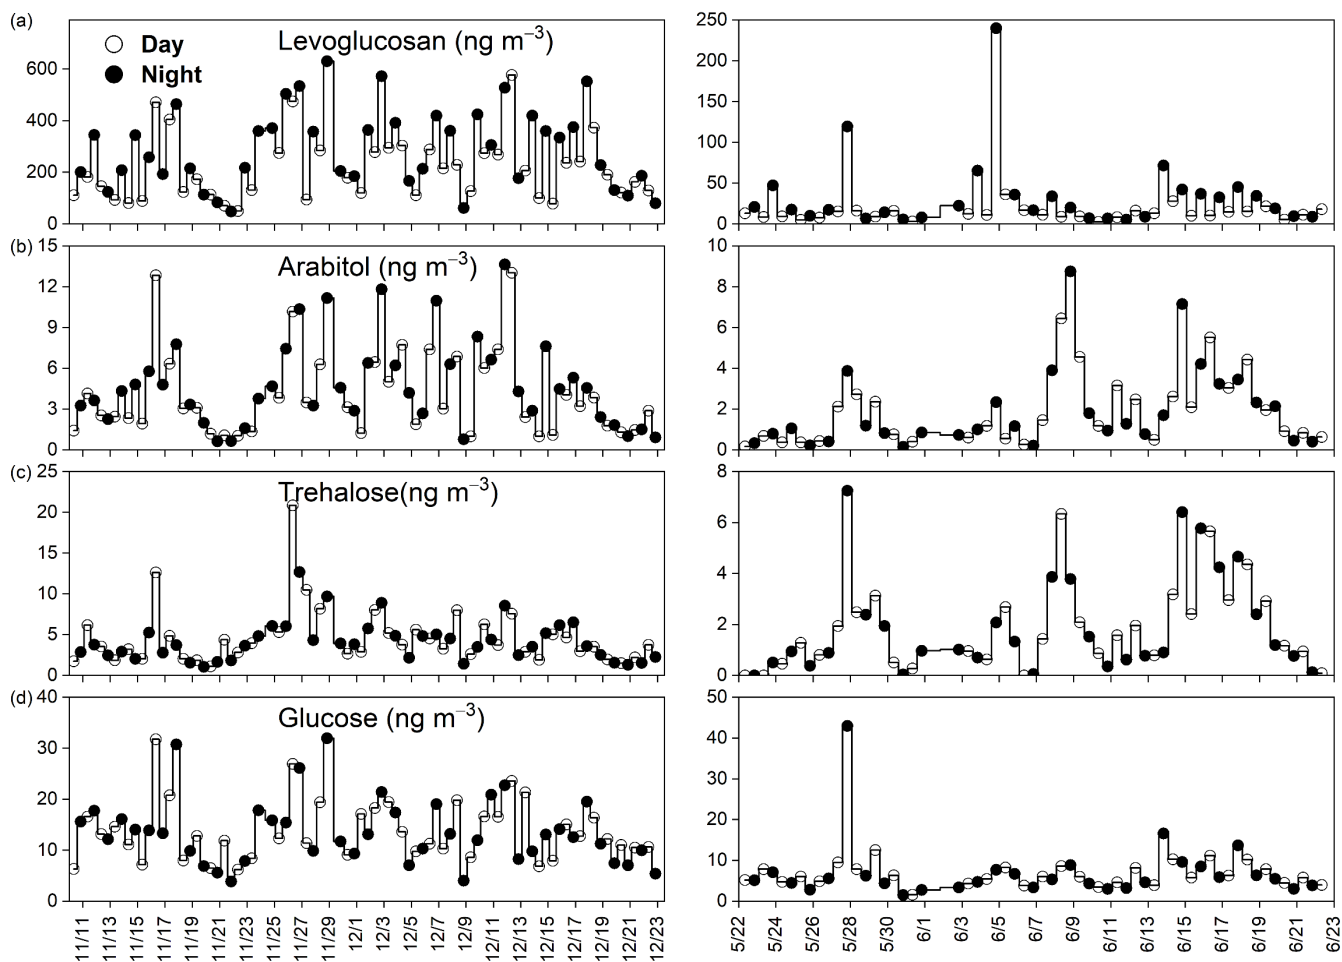

**Figure S2. Temporal variations in concentrations of sugar compounds including (a) levoglucosan, (b) arabitol, (c) trehalose, and (d) glucose in Tianjin.**

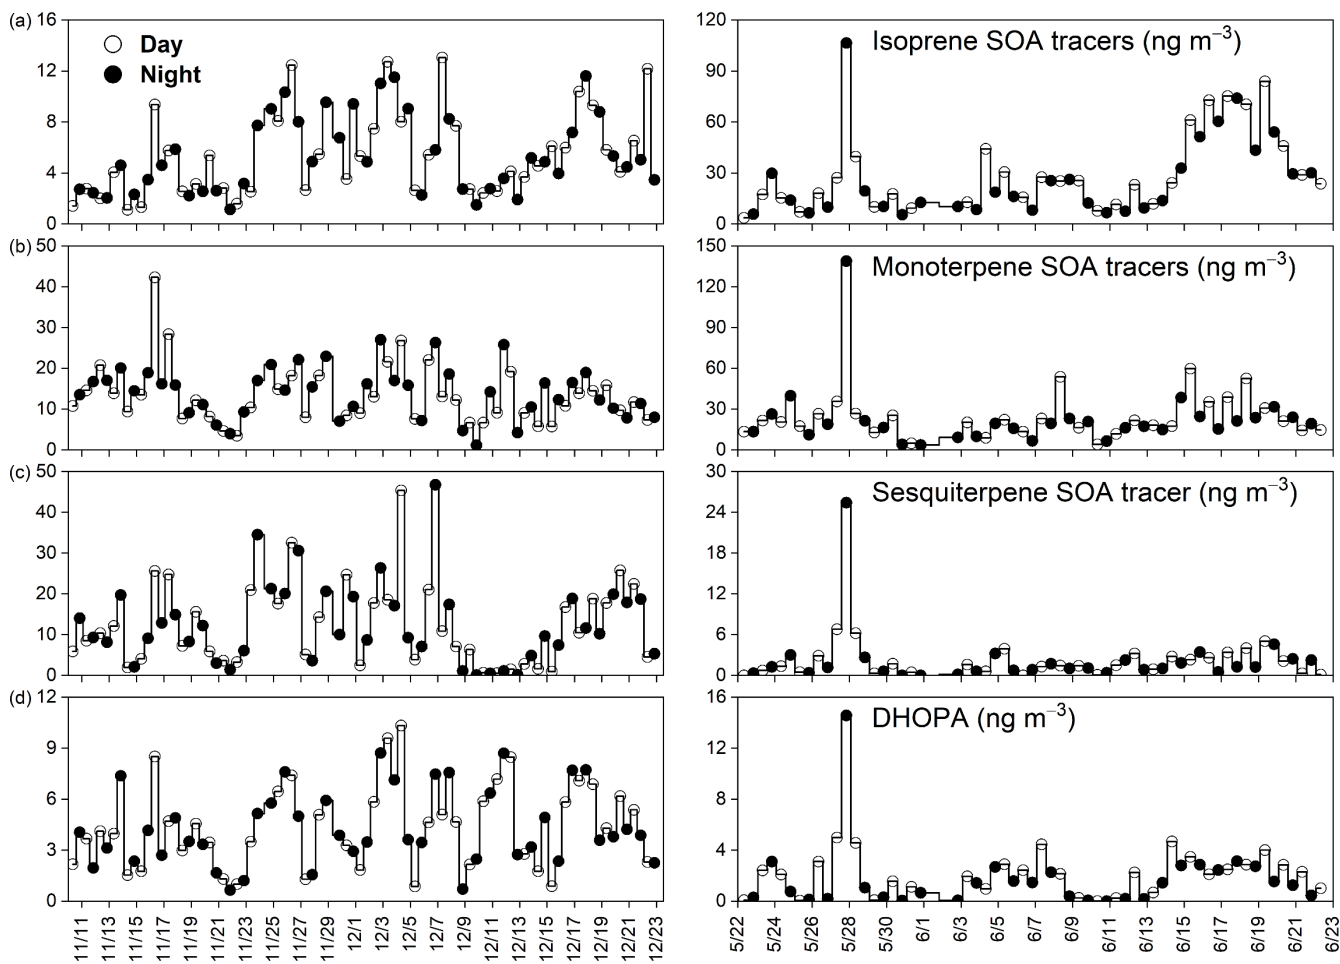

25

**Figure S3. Temporal variations in concentrations of SOA tracers in Tianjin: (a) isoprene SOA tracers, (b) monoterpene SOA tracers, (c) sesquiterpene SOA tracers, and (d) 2,3-dihydroxy-4-oxopentanoic acid (DHOPA).**

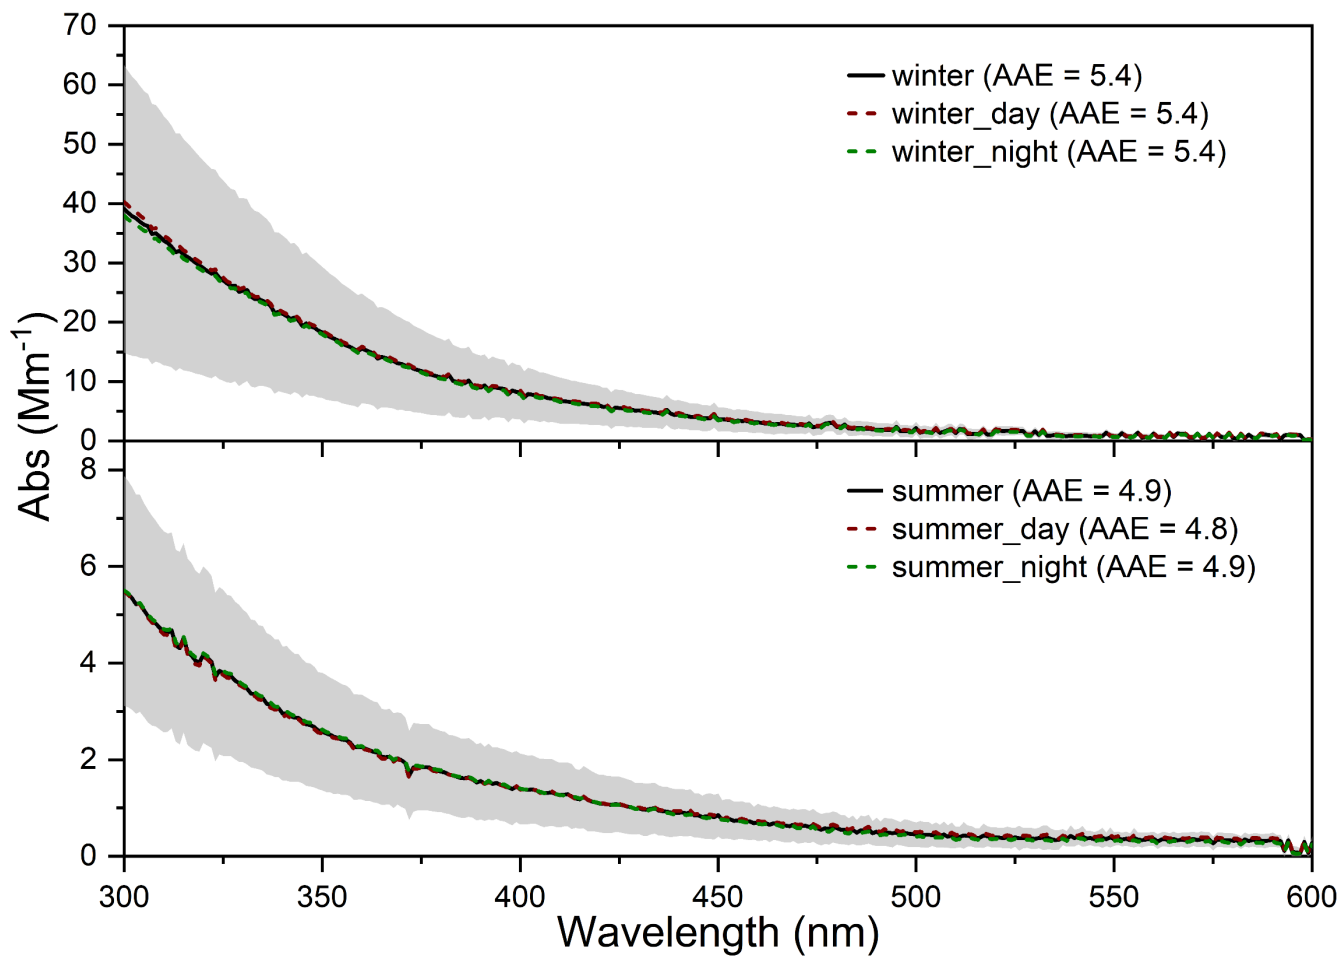

30 Figure S4. Wavelength dependence of BrC light absorption (Abs) in Tianjin. The shading represents the standard deviations.

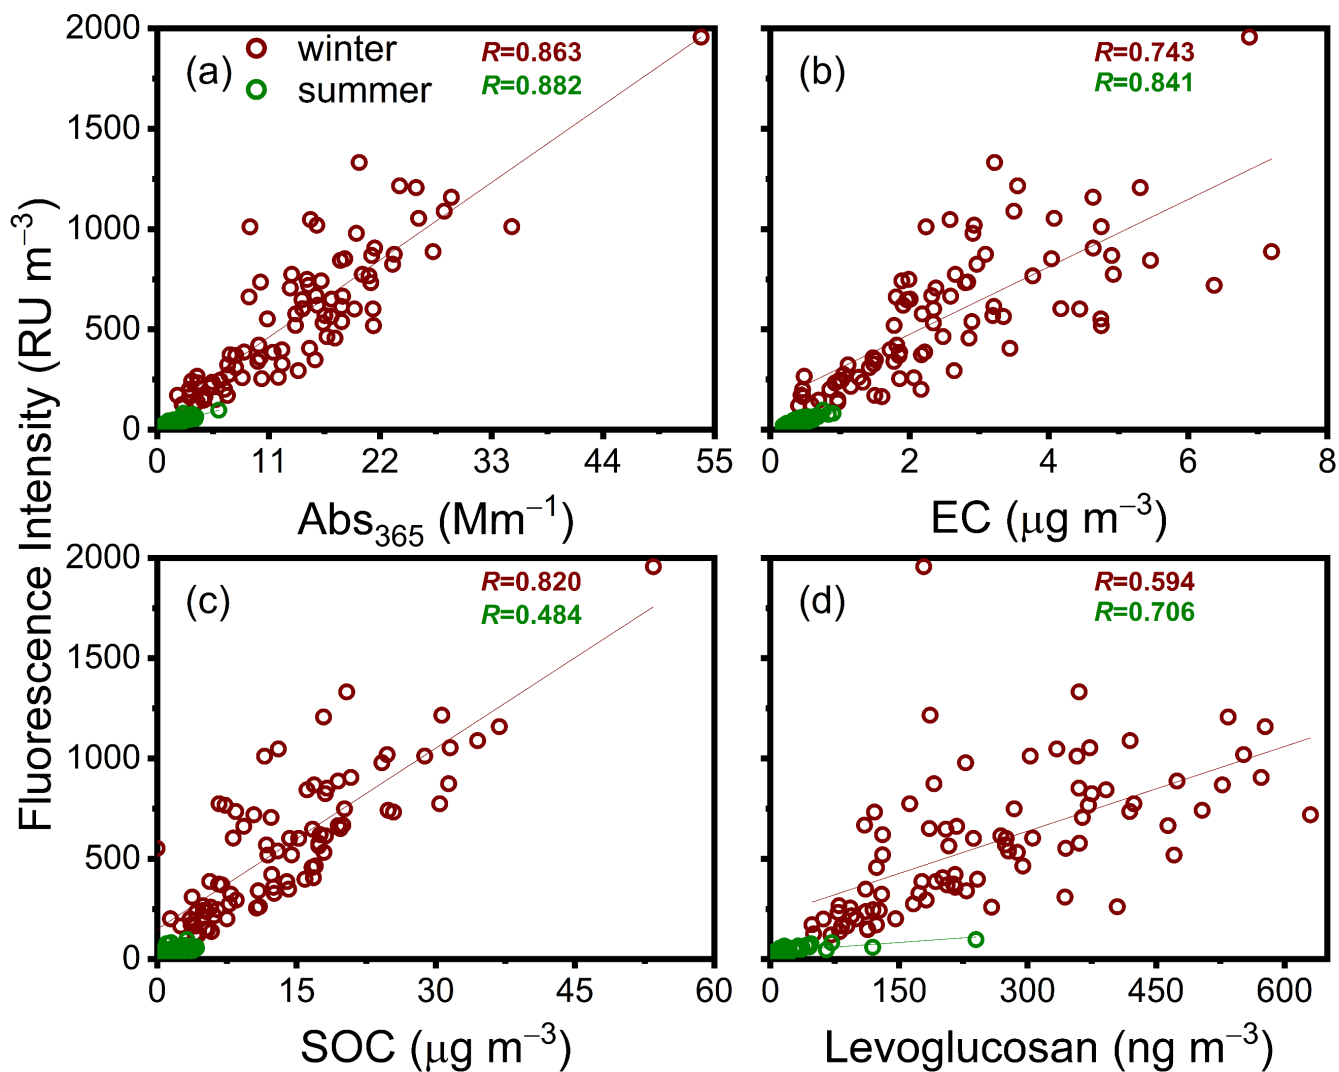

Figure S5. Correlations between fluorescent intensities and (a) Abs<sub>365</sub>, (b) EC, (c) SOC, and (d) levoglucosan in Tianjin.

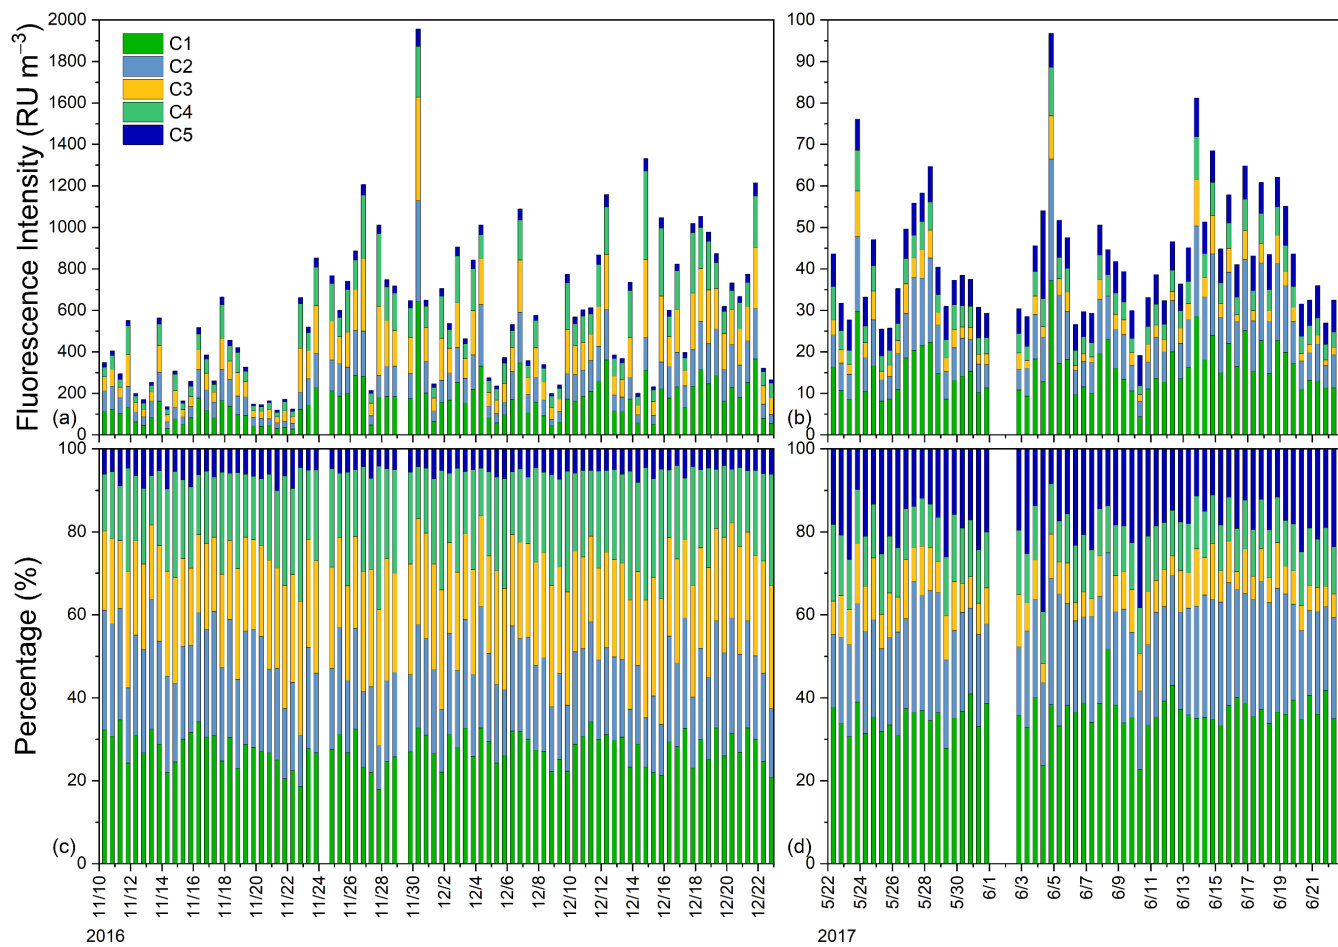

35

**Figure S6. (a–b) temporal variations in fluorescent intensities and (c–d) relative abundances of the PARAFAC-derived fluorescent components for the water-soluble BrC of aerosols in Tianjin.**



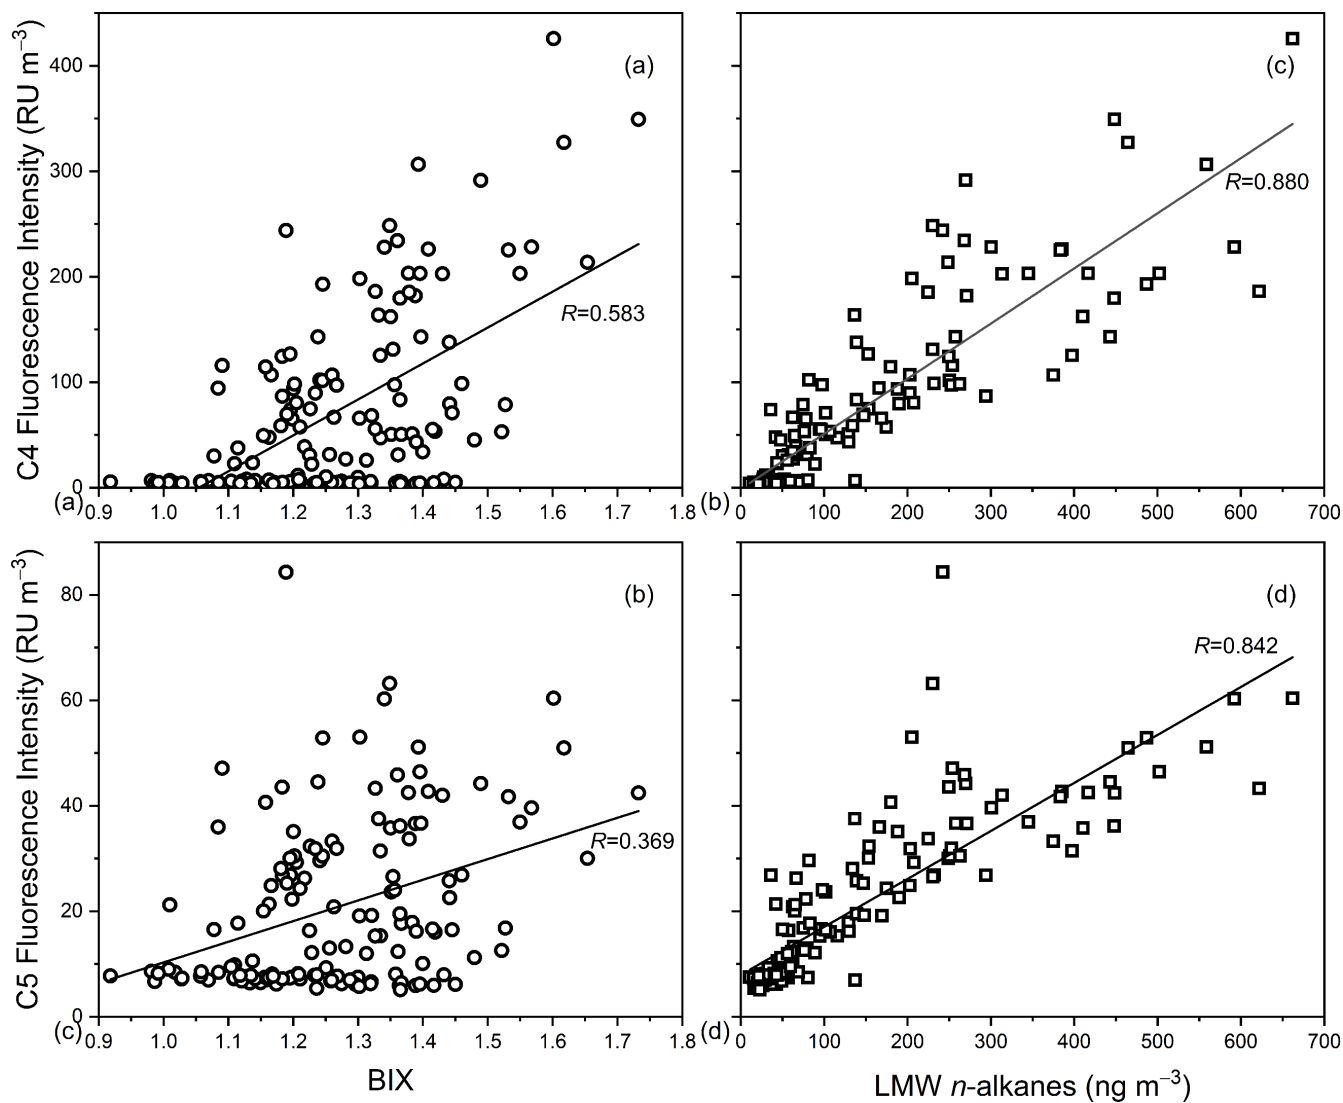

40 Figure S7. Correlations of BIX and low molecular weight (LMW) *n*-alkanes with fluorescent intensities of (a–b) C4 and (c–d) C5.
